# Supplementary material
Source: PubMed Central journal article supplement (PMC1934525)

# Supplementary Fig.1

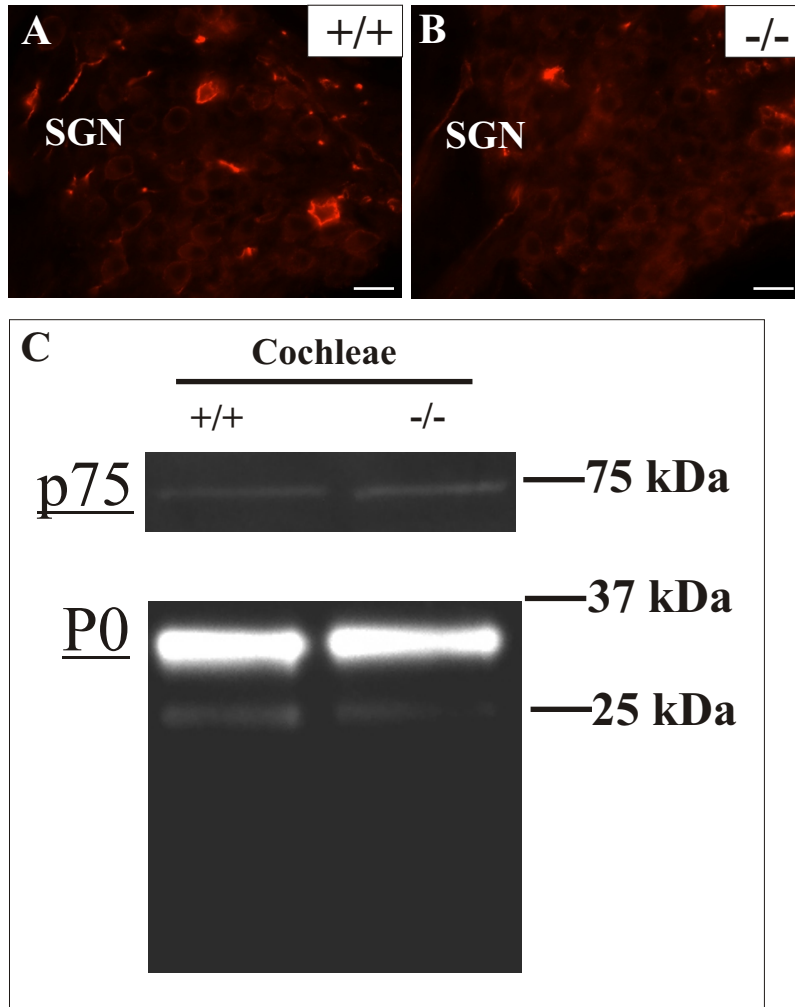

Scale bar (A & B) = 20 microns

Supplement: amjpathol_ajpath.2007.070068_1.pdf [file amjpathol_ajpath.2007.070068_1.pdf]
